# Supplementary material
Source: PubMed Central journal article supplement (PMC6449036)
Supplement: NIHMS1009965-supplement-Supplemental_table_1.pdf [file NIHMS1009965-supplement-Supplemental_table_1.pdf]

**Supplemental Table 1. Hospital Characteristics**

| Hospital | Teaching status | Setting    | Total # Discharges Annually | # Beds | Primary Payer (%) |          | Race (%) |                  |       |                 |                  | Ethnicity (%)    |                        |
|----------|-----------------|------------|-----------------------------|--------|-------------------|----------|----------|------------------|-------|-----------------|------------------|------------------|------------------------|
|          |                 |            |                             |        | Medicare          | Medicaid | White    | African American | Asian | American Indian | Pacific Islander | Spanish/Hispanic | Non-Spanish / Hispanic |
| 1        | Teaching        | Urban      | 11,010                      | 223    | 57.86             | 31.85    | 46.00    | 51.44            | 0.32  | 0.10            | 0.01             | 0.64             | 98.25                  |
| 2        | Teaching        | Inner-city | 3,6744                      | 912    | 42.09             | 43.33    | 18.76    | 67.53            | 0.92  | 0.15            | 0.01             | 7.15             | 80.67                  |
| 3        | Non-teaching    | Suburban   | 7,773                       | 115    | 52.31             | 25.91    | 61.83    | 22.63            | 4.75  | 0.58            | 0.06             | 7.23             | 87.64                  |
| 4        | Non-teaching    | Suburban   | 11,776                      | 262    | 43.14             | 38.11    | 20.43    | 75.07            | 0.77  | 0.18            | 0.06             | 3.38             | 95.03                  |
| 5        | Teaching        | Urban      | 8,543                       | 150    | 34.94             | 51.05    | 60.99    | 32.80            | 0.64  | 0.18            | 0.05             | 6.92             | 85.24                  |
| 6        | Teaching        | Suburban   | 9,376                       | 330    | 63.23             | 32.69    | 33.40    | 63.47            | 0.32  | 0.09            | 0.02             | 0.47             | 97.80                  |
| 7        | Teaching        | Suburban   | 23,949                      | 325    | 43.14             | 38.57    | 70.81    | 21.61            | 1.22  | 0.30            | 0.03             | 1.73             | 84.82                  |
| 8        | Non-teaching    | Rural      | 8,649                       | 109    | 40.48             | 31.85    | 76.12    | 19.24            | 1.29  | 0.09            | 0.01             | 1.62             | 97.51                  |
