# Supplementary material
Source: PubMed Central journal article supplement (PMC6449036)
Supplement: NIHMS1009965-supplement-Supplemental_table_2.pdf [file NIHMS1009965-supplement-Supplemental_table_2.pdf]

**Supplemental Table 2.** Patient characteristics according to responses to ‘comfort speaking up’ item.

| <b>Characteristic</b>    | <b>No problem</b><br>n = 5,254 | <b>Never comfortable</b><br>n=201 | <b>Sometimes comfortable</b><br>n=590 | <b>Usually comfortable</b><br>n=723 | <b>Always comfortable</b><br>n = 3,444 | <b>p-value</b> |
|--------------------------|--------------------------------|-----------------------------------|---------------------------------------|-------------------------------------|----------------------------------------|----------------|
| Age, years               |                                |                                   |                                       |                                     |                                        | <.001          |
| ≤ 35                     | 741 (45.9)                     | 31 (1.9)                          | 84 (5.2)                              | 134 (18.5)                          | 626 (38.7)                             |                |
| 36-45                    | 380 (45.6)                     | 14 (1.7)                          | 48 (5.8)                              | 57(6.8)                             | 335 (40.2)                             |                |
| 46-55                    | 744 (48.8)                     | 38 (2.5)                          | 93 (6.1)                              | 100 (6.6)                           | 551 (36.1)                             |                |
| 56-65                    | 1,213 (51.8)                   | 44 (1.9)                          | 118 (5.0)                             | 176 (7.5)                           | 790 (33.7)                             |                |
| 66-75                    | 1,275 (54.8)                   | 40 (1.7)                          | 138 (5.9)                             | 141(6.1)                            | 734 (31.5)                             |                |
| ≥ 76                     | 901 (57.5)                     | 34 (2.2)                          | 109 (18.5)                            | 115 (7.3)                           | 408 (26.0)                             |                |
| Sex                      |                                |                                   |                                       |                                     |                                        | 0.457          |
| Female                   | 3,134 (50.8)                   | 119 (1.9)                         | 364 (5.9)                             | 449 (7.3)                           | 2,109 (34.2)                           |                |
| Male                     | 2,120 (52.5)                   | 82 (2.0)                          | 226 (5.6)                             | 274 (6.8)                           | 1,335 (33.1)                           |                |
| Race                     |                                |                                   |                                       |                                     |                                        | <.001          |
| White                    | 1,945 (50.0)                   | 66 (1.7)                          | 187 (4.8)                             | 351 (9.0)                           | 1,338 (34.4)                           |                |
| African-American         | 2,508 (53.2)                   | 79 (1.7)                          | 293 (6.2)                             | 254 (5.4)                           | 1,577 (33.5)                           |                |
| Asian                    | 63 (39.4)                      | 3 (1.9)                           | 13 (8.1)                              | 24 (15.0)                           | 57 (35.6)                              |                |
| Other                    | 738 (50.8)                     | 53 (3.6)                          | 97 (16.4)                             | 94 (6.5)                            | 472 (32.5)                             |                |
| Ethnicity*               |                                |                                   |                                       |                                     |                                        | 0.025          |
| Non-Hispanic             | 4,600 (50.8)                   | 165 (1.8)                         | 521 (5.8)                             | 657 (7.3)                           | 3,116 (34.4)                           |                |
| Hispanic                 | 348 (57.4)                     | 13 (2.1)                          | 30 (5.0)                              | 37 (6.1)                            | 178 (29.4)                             |                |
| Education*               |                                |                                   |                                       |                                     |                                        | <.001          |
| ≤ 8 <sup>th</sup> grade  | 256 (60.1)                     | 11 (2.6)                          | 26 (6.1)                              | 21 (4.9)                            | 112 (26.3)                             |                |
| H.S. without grad        | 666 (62.4)                     | 20 (1.9)                          | 69 (6.5)                              | 46 (4.3)                            | 266 (24.9)                             |                |
| H.S. degree              | 1,803 (55.9)                   | 54 (1.7)                          | 172 (5.3)                             | 189 (5.9)                           | 1,006 (31.2)                           |                |
| Some college             | 1,347 (49.3)                   | 62 (2.3)                          | 150 (5.5)                             | 179 (6.6)                           | 994 (36.4)                             |                |
| College degree           | 479 (43.3)                     | 14 (1.3)                          | 53 (4.8)                              | 123 (11.1)                          | 438 (39.6)                             |                |
| > College degree         | 476 (39.1)                     | 15 (1.2)                          | 80 (6.6)                              | 144 (11.8)                          | 502 (41.2)                             |                |
| Language spoken at home* |                                |                                   |                                       |                                     |                                        | 0.009          |
| English                  | 4,721 (51.2)                   | 161 (1.7)                         | 520 (5.6)                             | 646 (7.0)                           | 3,167 (34.4)                           |                |
| Non-English              | 343 (53.8)                     | 17 (2.7)                          | 41 (6.4)                              | 56 (8.8)                            | 180 (28.3)                             |                |
| Admission through ED*    |                                |                                   |                                       |                                     |                                        | <.001          |
| Yes                      | 3,359 (51.5)                   | 141 (2.2)                         | 433 (6.6)                             | 454 (7.0)                           | 2,141 (32.8)                           |                |
| No                       | 1,739 (51.1)                   | 48 (1.4)                          | 139 (4.1)                             | 251 (7.4)                           | 1,224 (36.0)                           |                |
| Overall health*          |                                |                                   |                                       |                                     |                                        | <.001          |
| Excellent                | 797 (54.2)                     | 24 (1.6)                          | 54 (3.7)                              | 59 (4.0)                            | 536 (36.5)                             |                |
| Very good                | 1,353 (53.2)                   | 36 (1.4)                          | 110 (4.3)                             | 165 (6.5)                           | 536 (34.5)                             |                |
| Good                     | 1,646 (50.4)                   | 54 (1.7)                          | 210 (6.4)                             | 278 (8.5)                           | 1,075 (32.9)                           |                |
| Fair                     | 1,010 (50.8)                   | 55 (2.8)                          | 128 (6.4)                             | 149 (7.5)                           | 646 (32.5)                             |                |
| Poor                     | 322 (44.4)                     | 23 (3.2)                          | 70 (9.6)                              | 57 (7.9)                            | 254 (35.0)                             |                |
| Mental health*           |                                |                                   |                                       |                                     |                                        | <.001          |
| Excellent                | 1,683 (52.3)                   | 59 (1.8)                          | 114 (3.5)                             | 141 (4.4)                           | 1,219 (37.9)                           |                |
| Very good                | 1,585 (51.8)                   | 62 (2.0)                          | 158 (5.2)                             | 252 (8.2)                           | 1,002 (32.8)                           |                |
| Good                     | 1,358 (51.1)                   | 43 (1.6)                          | 192 (7.2)                             | 226 (8.5)                           | 836 (31.5)                             |                |
| Fair                     | 447 (49.0)                     | 21 (2.3)                          | 87 (9.5)                              | 70 (7.7)                            | 288 (31.5)                             |                |
| Poor                     | 89 (46.4)                      | 6 (3.1)                           | 22 (11.5)                             | 22 (11.5)                           | 53 (27.6)                              |                |

\* Not all patients responded to this question.

ED = Emergency Department
